# Supplementary material for: The Family Socialization Interview—Revised (FSI-R): a Comprehensive Assessment of Parental Disciplinary Behaviors
Source: Springer Nature journal article supplement (doi:10.1007/s11121-016-0707-7), 2016-10-07
Supplement: MOESM6 [file 10831838]

Supplemental Online Table S-6.

*Incremental Utility of FSI-R Most Intense Psychological Code Over CTSPC and P-COS*

|  | ADHD Symptoms (PAPA) | | DBD Symptoms (PAPA) | | Anxiety Symptoms (PAPA) | | Depression/Dysthymia Symptoms (PAPA) | |
| --- | --- | --- | --- | --- | --- | --- | --- | --- |
| Predictor | β | Δ*R2* | β | Δ*R2* | β | Δ*R2* | β | Δ*R2* |
| Step 1 |  | .01 |  | .02 |  | .00 |  | .03 |
| Control variablesa |  |  |  |  |  |  |  |  |
| Step 2 |  | .02 |  | .03 |  | .01 |  | .02 |
| Most Intense Psych.  (FSI-R; *Past Year*) | .12* |  | .16** |  | .08 |  | .15** |  |
| Step 3 |  | .07 |  | .03 |  | .02 |  | .02 |
| Most Intense Psychological  (FSI; *Past Year*) | .08 |  | .09 |  | .10 |  | .13* |  |
| Physical Aggression (CTSPC) | .28*** |  | .03 |  | .13* |  | .12 |  |
| Psych. Aggression (CTSPC) | -.06 |  | .17* |  | -.13 |  | -.04 |  |
| Problematic Discipline (P-COS) | .07 |  | .02 |  | .03 |  | .06 |  |
| Step 4 |  | .01 |  | .02 |  | .01 |  | .02 |
| Most Intense Psychological  (FSI-R; *Past Year*) | .02 |  | -.01 |  | .04 |  | .05 |  |
| Physical Aggression (CTSPC) | .28*** |  | .04 |  | .14* |  | .13* |  |
| Psych. Aggression (CTSPC) | -.09 |  | .13 |  | -.16* |  | -.07 |  |
| Problematic Discipline (P-COS) | .06 |  | .02 |  | .03 |  | .06 |  |
| Most Intense Psychological  (FSI-R; *Historical*) | .13 |  | .19** |  | .13 |  | .16* |  |
| Total *R2* | .10 |  | .10 |  | .04 |  | .08 |  |
| *n* | 339 |  | 341 |  | 336 |  | 338 |  |

*Note.* The first step included control variables. Step 2 included the Most Intense Psychological FSI Code for *Past Year* Era. Step 3 examined incremental utility of the FSI over the Psychological Aggression subscale of the CTSPC and the Problematic Discipline subscale of the P-COS. Step 4 included the Most Intense Psychological FSI Code for *Historical* Era. CTSPC = Conflict Tactics Scales Parent-Child version; FSI–R = Family Socialization Interview - Revised; PAPA = Preschool-Age Psychiatric Assessment; P-COS = Parent Clinical Observation Schedule.

a Control variables included child’s age, child’s gender, and days between study visits.

* *p* < .05 ** *p* < .01 *** *p* < .001
